# Supplementary material for: Veränderung der psychischen Belastung in der COVID-19-Pandemie in Deutschland: Ängste, individuelles Verhalten und die Relevanz von Information sowie Vertrauen in Behörden
Source: Springer Nature journal article supplement (doi:10.1007/s00103-021-03278-0), 2021-01-22
Supplement: MOESM1 [file 18791168]

## **Veränderung der psychischen Belastung in der COVID-19-Pandemie in Deutschland: Ängste, individuelles Verhalten und die Relevanz von Information sowie Vertrauen in Behörden**

Eva-Maria Skoda<sup>1</sup>, Anke Spura<sup>2</sup>, Freia De Bock<sup>2</sup>, Adam Schweda<sup>1</sup>, Nora Dörrie<sup>1</sup>, Madeleine Fink<sup>1</sup>, Venja Musche<sup>1</sup>, Benjamin Weismüller<sup>1</sup>, Anke Benecke<sup>1</sup>, Hannah Kohler<sup>1</sup>, Florian Junne<sup>3</sup>, Johanna Graf<sup>3</sup>, Alexander Bäuerle<sup>1</sup>, Martin Teufel<sup>1</sup>

<sup>1</sup>Klinik für Psychosomatische Medizin und Psychotherapie, Universität Duisburg-Essen, LVR-Klinikum Essen, Essen, Deutschland.

<sup>2</sup>Bundeszentrale für gesundheitliche Aufklärung (BZgA), Köln, Deutschland.

<sup>3</sup>Abteilung für Psychosomatische Medizin und Psychotherapie, Universität Tübingen, Medizinische Universitätsklinik, Tübingen, Deutschland.

### **Korrespondenzadresse**

Dr. Eva-Maria Skoda  
Universität Duisburg-Essen  
Klinik für Psychosomatische Medizin und Psychotherapie  
LVR-Klinikum Essen  
Virchowstr. 174  
45147 Essen  
[eva-maria.skoda@uni-due.de](mailto:eva-maria.skoda@uni-due.de)

### **Inhalt:**

#### **Messinstrumente**

Tabelle Z1: Items zu den Skalen der COVID-19 bezogene Erlebens- und Verhaltensweisen

#### **Regressionstabellen**

##### **Konditionale Effekte der Regressionsanalysen**

##### **Robuste Regressionen**

#### **Referenzen**

Tabelle Z2: Konditionale Effekte der Regressionsanalysen

Tabelle Z3: Regressionskoeffizienten

Tabelle Z4: Robuste Regressionen

## Messinstrumente

Tab. Z1: Items zu den Skalen der COVID-19 bezogene Erlebens- und Verhaltensweisen

| SKALENNAME                                                                                                           | ITEMS                                                                                                                                                                                                                                                                                                                                                                                                                  |
|----------------------------------------------------------------------------------------------------------------------|------------------------------------------------------------------------------------------------------------------------------------------------------------------------------------------------------------------------------------------------------------------------------------------------------------------------------------------------------------------------------------------------------------------------|
| <i>COVID-19-BEZOGENE ANGST</i>                                                                                       | 1. „COVID-19 (Corona-Virus) beunruhigt mich“                                                                                                                                                                                                                                                                                                                                                                           |
| <i>VERTRAUEN IN STAATLICHE MAßNAHMEN IN BEZUG AUF COVID-19</i>                                                       | <p>1. „Ich denke, Deutschland ist gut auf COVID-19 (Corona-Virus) vorbereitet.“</p> <p>2. „Ich denke, es werden alle staatlichen Maßnahmen ergriffen, um COVID-19 (Corona-Virus) zu bekämpfen.“</p> <p>3. „Ich habe Vertrauen in das staatliche System in Deutschland.“</p>                                                                                                                                            |
| <i>SUBJEKTIVES INFORMIERTHEITSLABEL IN BEZUG AUF COVID-19</i>                                                        | <p>1. „Ich fühle mich über COVID-19 (Corona-Virus) informiert.“</p> <p>2. „Ich fühle mich über Maßnahmen zur Vermeidung einer Ansteckung mit COVID-19 (Corona -Virus) informiert.“</p> <p>3. „Ich verstehe die Hinweise der Gesundheitsbehörden hinsichtlich COVID-19 (Corona-Virus).“</p>                                                                                                                             |
| <i>ADHÄRENTES (STAATLICHEN/WISSENSCHAFTLICHEN EMPFEHLUNGEN FOLGENDES) SICHERHEITSVERHALTEN IN BEZUG AUF COVID-19</i> | <p>„Seit Ausbruch von COVID-19 (Corona-Virus) in Europa...“</p> <p>1. „... wasche/desinfiziere ich mir häufiger die Hände.“</p> <p>2. „...vermeide ich vermehrt öffentliche Plätze/Veranstaltungen“</p> <p>3. „...vermeide ich vermehrt öffentlichen Nahverkehr (U-Bahn, Straßenbahn, Bus, Zug).“</p> <p>4. „... habe ich meine Reise-/Urlaubspläne geändert oder würde Sie ändern, wenn ich etwas geplant hätte.“</p> |

## Regressionstabellen

### Konditionale Effekte der Regressionsanalysen

Um genau zu untersuchen, wie sich der Verlauf unserer gemessenen Konstrukte verhält, errechneten wir konditionale / marginale Effekte für die kategoriale Variable „Phase“ für jedes unserer zehn Regressionsmodelle. Die paarweisen Vergleiche, inklusive 95%-Konfidenzintervalle, p-Werte und Cohens d finden sich in den Tabellen Z2.

### Robuste Regressionen

Aufgrund der Verletzung der Annahme der Homoskedastizität ist davon auszugehen, dass die Schätzer der linearen Regressionanalysen einem systematischen Bias unterliegen. Die Ergebnisse werden entsprechend um eine Neudarstellung der Analysen mittels heteroskedastizitäts-robuster Regression ergänzt, welche mit dem R Befehl `vcovHC` aus dem Paket `sandwich` (Zeileis, 2004) errechnet wurde. Die Ergebnisse sind in den Tabellen Z3a bis Z3c zu finden. Die Ergebnisse unterscheiden sich kaum von denen der ordinary least squares regression, welche in Tab. Z2 aufgeführt sind.

### Referenz

Zeileis, A. (2004). Econometric Computing with HC and HAC Covariance Matrix Estimators. *Journal of Statistical Software*, 11(10), 1 - 17.  
doi:<http://dx.doi.org/10.18637/jss.v011.i10>

**Tab. Z2: Konditionale Effekte der Regressionsanalysen**

| Tabelle 2a: Generalisierte Angst (GAD-7) |                      |                      |                     |                |           |         |        |        |
|------------------------------------------|----------------------|----------------------|---------------------|----------------|-----------|---------|--------|--------|
| Vergleich                                | Schätzer / Differenz | Untere 95%-CI-Grenze | Obere 95%-CI-Grenze | Standardfehler | df        | t-Ratio | p-Wert | d      |
| erste Phase - zweite Phase               | -1,492               | -1,734               | -1,250              | 0,089          | 16888,000 | -16,799 | 0,000  | -0,334 |
| erste Phase - dritte Phase               | -1,699               | -1,978               | -1,420              | 0,102          | 16888,000 | -16,629 | 0,000  | -0,380 |
| erste Phase - vierte Phase               | -1,856               | -2,199               | -1,514              | 0,126          | 16888,000 | -14,782 | 0,000  | -0,415 |
| erste Phase - fünfte Phase               | -1,454               | -1,805               | -1,104              | 0,128          | 16888,000 | -11,334 | 0,000  | -0,325 |
| zweite Phase - dritte Phase              | -0,207               | -0,503               | 0,089               | 0,108          | 16888,000 | -1,908  | 0,313  | -0,046 |
| zweite Phase - vierte Phase              | -0,364               | -0,722               | -0,007              | 0,131          | 16888,000 | -2,779  | 0,043  | -0,081 |
| zweite Phase - fünfte Phase              | 0,038                | -0,328               | 0,403               | 0,134          | 16888,000 | 0,280   | 0,999  | 0,008  |
| dritte Phase - vierte Phase              | -0,157               | -0,538               | 0,224               | 0,140          | 16888,000 | -1,126  | 0,793  | -0,035 |
| dritte Phase - fünfte Phase              | 0,244                | -0,143               | 0,632               | 0,142          | 16888,000 | 1,722   | 0,420  | 0,055  |
| vierte Phase - fünfte Phase              | 0,402                | -0,031               | 0,835               | 0,159          | 16888,000 | 2,532   | 0,084  | 0,090  |

| Tabelle 2b: Depressive Symptome (PHQ-2) |                      |                      |                     |                |           |         |        |        |
|-----------------------------------------|----------------------|----------------------|---------------------|----------------|-----------|---------|--------|--------|
| Vergleich                               | Schätzer / Differenz | Untere 95%-CI-Grenze | Obere 95%-CI-Grenze | Standardfehler | df        | t-Ratio | p-Wert | d      |
| erste Phase - zweite Phase              | -0,252               | -0,328               | -0,176              | 0,028          | 16888,000 | -9,017  | 0,000  | -0,179 |
| erste Phase - dritte Phase              | -0,518               | -0,605               | -0,430              | 0,032          | 16888,000 | -16,101 | 0,000  | -0,368 |
| erste Phase - vierte Phase              | -0,671               | -0,778               | -0,563              | 0,040          | 16888,000 | -16,975 | 0,000  | -0,477 |
| erste Phase - fünfte Phase              | -0,608               | -0,718               | -0,498              | 0,040          | 16888,000 | -15,051 | 0,000  | -0,432 |
| zweite Phase - dritte Phase             | -0,266               | -0,359               | -0,172              | 0,034          | 16888,000 | -7,782  | 0,000  | -0,189 |
| zweite Phase - vierte Phase             | -0,419               | -0,531               | -0,306              | 0,041          | 16888,000 | -10,153 | 0,000  | -0,298 |
| zweite Phase - fünfte Phase             | -0,356               | -0,471               | -0,241              | 0,042          | 16888,000 | -8,445  | 0,000  | -0,253 |
| dritte Phase - vierte Phase             | -0,153               | -0,273               | -0,033              | 0,044          | 16888,000 | -3,484  | 0,005  | -0,109 |
| dritte Phase - fünfte Phase             | -0,090               | -0,212               | 0,032               | 0,045          | 16888,000 | -2,017  | 0,258  | -0,064 |
| vierte Phase - fünfte Phase             | 0,063                | -0,073               | 0,199               | 0,050          | 16888,000 | 1,262   | 0,715  | 0,045  |

| Tabelle 2c: Distress-Thermometer |                      |                      |                     |                |           |         |        |        |
|----------------------------------|----------------------|----------------------|---------------------|----------------|-----------|---------|--------|--------|
| Vergleich                        | Schätzer / Differenz | Untere 95%-CI-Grenze | Obere 95%-CI-Grenze | Standardfehler | df        | t-Ratio | p-Wert | d      |
| erste Phase - zweite Phase       | -0,615               | -0,766               | -0,465              | 0,055          | 16888,000 | -11,142 | 0,000  | -0,221 |
| erste Phase - dritte Phase       | -0,545               | -0,718               | -0,371              | 0,064          | 16888,000 | -8,575  | 0,000  | -0,196 |
| erste Phase - vierte Phase       | -0,679               | -0,892               | -0,466              | 0,078          | 16888,000 | -8,697  | 0,000  | -0,244 |
| erste Phase - fünfte Phase       | -0,622               | -0,839               | -0,404              | 0,080          | 16888,000 | -7,795  | 0,000  | -0,224 |
| zweite Phase - dritte Phase      | 0,071                | -0,113               | 0,254               | 0,067          | 16888,000 | 1,046   | 0,834  | 0,025  |
| zweite Phase - vierte Phase      | -0,064               | -0,286               | 0,159               | 0,081          | 16888,000 | -0,783  | 0,936  | -0,023 |
| zweite Phase - fünfte Phase      | -0,007               | -0,234               | 0,220               | 0,083          | 16888,000 | -0,080  | 1,000  | -0,002 |
| dritte Phase - vierte Phase      | -0,134               | -0,371               | 0,103               | 0,087          | 16888,000 | -1,547  | 0,532  | -0,048 |
| dritte Phase - fünfte Phase      | -0,077               | -0,318               | 0,164               | 0,088          | 16888,000 | -0,875  | 0,906  | -0,028 |
| vierte Phase - fünfte Phase      | 0,057                | -0,212               | 0,326               | 0,099          | 16888,000 | 0,579   | 0,978  | 0,021  |

| Tabelle 2d: COVID-19-bezogene Angst |                      |                      |                     |                |           |         |        |        |
|-------------------------------------|----------------------|----------------------|---------------------|----------------|-----------|---------|--------|--------|
| Vergleich                           | Schätzer / Differenz | Untere 95%-CI-Grenze | Obere 95%-CI-Grenze | Standardfehler | df        | t-Ratio | p-Wert | d      |
| erste Phase - zweite Phase          | -0,694               | -0,789               | -0,599              | 0,035          | 16888,000 | -19,898 | 0,000  | -0,395 |
| erste Phase - dritte Phase          | -0,286               | -0,395               | -0,176              | 0,040          | 16888,000 | -7,122  | 0,000  | -0,163 |
| erste Phase - vierte Phase          | 0,345                | 0,210                | 0,479               | 0,049          | 16888,000 | 6,995   | 0,000  | 0,196  |
| erste Phase - fünfte Phase          | 0,690                | 0,553                | 0,828               | 0,050          | 16888,000 | 13,706  | 0,000  | 0,393  |
| zweite Phase - dritte Phase         | 0,408                | 0,292                | 0,524               | 0,043          | 16888,000 | 9,584   | 0,000  | 0,232  |
| zweite Phase - vierte Phase         | 1,039                | 0,898                | 1,179               | 0,051          | 16888,000 | 20,184  | 0,000  | 0,592  |
| zweite Phase - fünfte Phase         | 1,384                | 1,241                | 1,528               | 0,053          | 16888,000 | 26,338  | 0,000  | 0,789  |
| dritte Phase - vierte Phase         | 0,631                | 0,481                | 0,780               | 0,055          | 16888,000 | 11,496  | 0,000  | 0,359  |
| dritte Phase - fünfte Phase         | 0,976                | 0,824                | 1,128               | 0,056          | 16888,000 | 17,512  | 0,000  | 0,556  |
| vierte Phase - fünfte Phase         | 0,346                | 0,176                | 0,516               | 0,062          | 16888,000 | 5,548   | 0,000  | 0,197  |

| Tabelle 2e: Vertrauen in staatliche Maßnahmen in Bezug auf COVID-19 |                      |                      |                     |                |           |         |        |        |
|---------------------------------------------------------------------|----------------------|----------------------|---------------------|----------------|-----------|---------|--------|--------|
| Vergleich                                                           | Schätzer / Differenz | Untere 95%-CI-Grenze | Obere 95%-CI-Grenze | Standardfehler | df        | t-Ratio | p-Wert | d      |
| erste Phase - zweite Phase                                          | -0,322               | -0,397               | -0,246              | 0,028          | 16888,000 | -11,655 | 0,000  | -0,231 |
| erste Phase - dritte Phase                                          | -0,598               | -0,685               | -0,512              | 0,032          | 16888,000 | -18,839 | 0,000  | -0,430 |
| erste Phase - vierte Phase                                          | -0,597               | -0,704               | -0,491              | 0,039          | 16888,000 | -15,302 | 0,000  | -0,430 |
| erste Phase - fünfte Phase                                          | -0,444               | -0,553               | -0,335              | 0,040          | 16888,000 | -11,139 | 0,000  | -0,320 |
| zweite Phase - dritte Phase                                         | -0,277               | -0,368               | -0,185              | 0,034          | 16888,000 | -8,201  | 0,000  | -0,199 |
| zweite Phase - vierte Phase                                         | -0,276               | -0,387               | -0,164              | 0,041          | 16888,000 | -6,763  | 0,000  | -0,198 |
| zweite Phase - fünfte Phase                                         | -0,123               | -0,236               | -0,009              | 0,042          | 16888,000 | -2,945  | 0,027  | -0,088 |
| dritte Phase - vierte Phase                                         | 0,001                | -0,117               | 0,119               | 0,043          | 16888,000 | 0,022   | 1,000  | 0,001  |
| dritte Phase - fünfte Phase                                         | 0,154                | 0,034                | 0,274               | 0,044          | 16888,000 | 3,489   | 0,004  | 0,111  |
| vierte Phase - fünfte Phase                                         | 0,153                | 0,018                | 0,288               | 0,049          | 16888,000 | 3,102   | 0,017  | 0,110  |

| Tabelle 2f: Subjektives Informiertheitslevel in Bezug auf COVID-19 |                      |                      |                     |                |           |         |        |        |
|--------------------------------------------------------------------|----------------------|----------------------|---------------------|----------------|-----------|---------|--------|--------|
| Vergleich                                                          | Schätzer / Differenz | Untere 95%-CI-Grenze | Obere 95%-CI-Grenze | Standardfehler | df        | t-Ratio | p-Wert | d      |
| erste Phase - zweite Phase                                         | -0,371               | -0,429               | -0,314              | 0,021          | 16888,000 | -17,710 | 0,000  | -0,352 |
| erste Phase - dritte Phase                                         | -0,189               | -0,255               | -0,123              | 0,024          | 16888,000 | -7,820  | 0,000  | -0,179 |
| erste Phase - vierte Phase                                         | 0,105                | 0,024                | 0,186               | 0,030          | 16888,000 | 3,528   | 0,004  | 0,099  |
| erste Phase - fünfte Phase                                         | 0,191                | 0,109                | 0,274               | 0,030          | 16888,000 | 6,312   | 0,000  | 0,181  |
| zweite Phase - dritte Phase                                        | 0,183                | 0,113                | 0,253               | 0,026          | 16888,000 | 7,135   | 0,000  | 0,173  |
| zweite Phase - vierte Phase                                        | 0,476                | 0,392                | 0,561               | 0,031          | 16888,000 | 15,380  | 0,000  | 0,451  |
| zweite Phase - fünfte Phase                                        | 0,563                | 0,477                | 0,649               | 0,032          | 16888,000 | 17,800  | 0,000  | 0,533  |
| dritte Phase - vierte Phase                                        | 0,293                | 0,203                | 0,383               | 0,033          | 16888,000 | 8,891   | 0,000  | 0,278  |
| dritte Phase - fünfte Phase                                        | 0,380                | 0,289                | 0,471               | 0,034          | 16888,000 | 11,332  | 0,000  | 0,360  |
| vierte Phase - fünfte Phase                                        | 0,087                | -0,016               | 0,189               | 0,037          | 16888,000 | 2,312   | 0,141  | 0,082  |

| Tabelle 2g: Adhärentes Sicherheitsverhalten |                      |                      |                     |                |           |         |        |        |
|---------------------------------------------|----------------------|----------------------|---------------------|----------------|-----------|---------|--------|--------|
| Vergleich                                   | Schätzer / Differenz | Untere 95%-CI-Grenze | Obere 95%-CI-Grenze | Standardfehler | df        | t-Ratio | p-Wert | d      |
| erste Phase - zweite Phase                  | -1,508               | -1,584               | -1,433              | 0,028          | 16888,000 | -54,218 | 0,000  | -1,077 |
| erste Phase - dritte Phase                  | -1,374               | -1,462               | -1,287              | 0,032          | 16888,000 | -42,943 | 0,000  | -0,981 |
| erste Phase - vierte Phase                  | -0,745               | -0,853               | -0,638              | 0,039          | 16888,000 | -18,943 | 0,000  | -0,532 |
| erste Phase - fünfte Phase                  | -0,196               | -0,305               | -0,086              | 0,040          | 16888,000 | -4,871  | 0,000  | -0,140 |
| zweite Phase - dritte Phase                 | 0,134                | 0,041                | 0,227               | 0,034          | 16888,000 | 3,944   | 0,001  | 0,096  |
| zweite Phase - vierte Phase                 | 0,763                | 0,651                | 0,875               | 0,041          | 16888,000 | 18,588  | 0,000  | 0,545  |
| zweite Phase - fünfte Phase                 | 1,313                | 1,198                | 1,427               | 0,042          | 16888,000 | 31,301  | 0,000  | 0,937  |
| dritte Phase - vierte Phase                 | 0,629                | 0,510                | 0,749               | 0,044          | 16888,000 | 14,377  | 0,000  | 0,449  |
| dritte Phase - fünfte Phase                 | 1,179                | 1,057                | 1,300               | 0,044          | 16888,000 | 26,499  | 0,000  | 0,841  |
| vierte Phase - fünfte Phase                 | 0,549                | 0,414                | 0,685               | 0,050          | 16888,000 | 11,052  | 0,000  | 0,392  |

| Tabelle 2h: %-Risiko, an COVID-19 zu erkranken |                      |                      |                     |                |           |         |        |        |
|------------------------------------------------|----------------------|----------------------|---------------------|----------------|-----------|---------|--------|--------|
| Vergleich                                      | Schätzer / Differenz | Untere 95%-CI-Grenze | Obere 95%-CI-Grenze | Standardfehler | df        | t-Ratio | p-Wert | d      |
| erste Phase - zweite Phase                     | -7,671               | -9,049               | -6,293              | 0,505          | 16888,000 | -15,187 | 0,000  | -0,302 |
| erste Phase - dritte Phase                     | -4,452               | -6,037               | -2,867              | 0,581          | 16888,000 | -7,661  | 0,000  | -0,175 |
| erste Phase - vierte Phase                     | 3,914                | 1,966                | 5,862               | 0,714          | 16888,000 | 5,480   | 0,000  | 0,154  |
| erste Phase - fünfte Phase                     | 13,098               | 11,107               | 15,089              | 0,730          | 16888,000 | 17,947  | 0,000  | 0,515  |
| zweite Phase - dritte Phase                    | 3,219                | 1,536                | 4,902               | 0,617          | 16888,000 | 5,218   | 0,000  | 0,127  |
| zweite Phase - vierte Phase                    | 11,585               | 9,551                | 13,619              | 0,745          | 16888,000 | 15,540  | 0,000  | 0,456  |
| zweite Phase - fünfte Phase                    | 20,769               | 18,692               | 22,846              | 0,761          | 16888,000 | 27,278  | 0,000  | 0,817  |
| dritte Phase - vierte Phase                    | 8,366                | 6,198                | 10,533              | 0,795          | 16888,000 | 10,529  | 0,000  | 0,329  |
| dritte Phase - fünfte Phase                    | 17,550               | 15,347               | 19,753              | 0,807          | 16888,000 | 21,734  | 0,000  | 0,690  |
| vierte Phase - fünfte Phase                    | 9,184                | 6,722                | 11,646              | 0,902          | 16888,000 | 10,176  | 0,000  | 0,361  |

| Tabelle 2i: %-Risiko, im Falle einer Infektion einen schweren Verlauf zu erleben |                      |                      |                     |                |           |         |        |        |
|----------------------------------------------------------------------------------|----------------------|----------------------|---------------------|----------------|-----------|---------|--------|--------|
| Vergleich                                                                        | Schätzer / Differenz | Untere 95%-CI-Grenze | Obere 95%-CI-Grenze | Standardfehler | df        | t-Ratio | p-Wert | d      |
| erste Phase - zweite Phase                                                       | -2,415               | -3,613               | -1,218              | 0,439          | 16888,000 | -5,501  | 0,000  | -0,109 |
| erste Phase - dritte Phase                                                       | -2,517               | -3,895               | -1,139              | 0,505          | 16888,000 | -4,982  | 0,000  | -0,114 |
| erste Phase - vierte Phase                                                       | 0,067                | -1,627               | 1,760               | 0,621          | 16888,000 | 0,107   | 1,000  | 0,003  |
| erste Phase - fünfte Phase                                                       | 0,859                | -0,872               | 2,589               | 0,634          | 16888,000 | 1,353   | 0,658  | 0,039  |
| zweite Phase - dritte Phase                                                      | -0,101               | -1,564               | 1,362               | 0,536          | 16888,000 | -0,189  | 1,000  | -0,005 |
| zweite Phase - vierte Phase                                                      | 2,482                | 0,714                | 4,250               | 0,648          | 16888,000 | 3,830   | 0,001  | 0,112  |
| zweite Phase - fünfte Phase                                                      | 3,274                | 1,468                | 5,080               | 0,662          | 16888,000 | 4,947   | 0,000  | 0,148  |
| dritte Phase - vierte Phase                                                      | 2,583                | 0,699                | 4,468               | 0,691          | 16888,000 | 3,740   | 0,002  | 0,117  |
| dritte Phase - fünfte Phase                                                      | 3,375                | 1,460                | 5,290               | 0,702          | 16888,000 | 4,808   | 0,000  | 0,153  |
| vierte Phase - fünfte Phase                                                      | 0,792                | -1,348               | 2,932               | 0,785          | 16888,000 | 1,009   | 0,851  | 0,036  |

| Tabelle 2j: %-Risiko, im Falle einer Infektion zu sterben |                      |                      |                     |                |           |         |        |        |
|-----------------------------------------------------------|----------------------|----------------------|---------------------|----------------|-----------|---------|--------|--------|
| Vergleich                                                 | Schätzer / Differenz | Untere 95%-CI-Grenze | Obere 95%-CI-Grenze | Standardfehler | df        | t-Ratio | p-Wert | d      |
| erste Phase - zweite Phase                                | -2,212               | -3,201               | -1,222              | 0,363          | 16888,000 | -6,098  | 0,000  | -0,121 |
| erste Phase - dritte Phase                                | -2,886               | -4,024               | -1,748              | 0,417          | 16888,000 | -6,918  | 0,000  | -0,158 |
| erste Phase - vierte Phase                                | -1,377               | -2,776               | 0,022               | 0,513          | 16888,000 | -2,685  | 0,056  | -0,075 |
| erste Phase - fünfte Phase                                | -2,213               | -3,642               | -0,783              | 0,524          | 16888,000 | -4,223  | 0,000  | -0,121 |
| zweite Phase - dritte Phase                               | -0,674               | -1,883               | 0,534               | 0,443          | 16888,000 | -1,523  | 0,548  | -0,037 |
| zweite Phase - vierte Phase                               | 0,835                | -0,625               | 2,295               | 0,535          | 16888,000 | 1,560   | 0,523  | 0,046  |
| zweite Phase - fünfte Phase                               | -0,001               | -1,492               | 1,490               | 0,547          | 16888,000 | -0,002  | 1,000  | 0,000  |
| dritte Phase - vierte Phase                               | 1,509                | -0,047               | 3,065               | 0,570          | 16888,000 | 2,646   | 0,062  | 0,083  |
| dritte Phase - fünfte Phase                               | 0,673                | -0,908               | 2,255               | 0,580          | 16888,000 | 1,161   | 0,773  | 0,037  |
| vierte Phase - fünfte Phase                               | -0,836               | -2,604               | 0,932               | 0,648          | 16888,000 | -1,290  | 0,697  | -0,046 |

**Tabelle Z3: Regressionskoeffizienten.** Links sind die jeweiligen Dummy-codierten unabhängigen Variablen verzeichnet. Die Referenzkategorie wurde mit angegeben. Jede Spalte bildet eine oben verzeichnete abhängige Variable ab. Zusätzlich zu den jeweiligen Regressionsgewichten ist das 95%-Konfidenzintervall angegeben.

| Variable                             | Regressionsterm                      | Generalisierte Angst (GAD-7) | Depressive Symptome (PHQ-2) | COVID-19-bezogene Angst     | Vertrauen in politische Maßnahmen | Subjektives Informiertheitslevel | Adhärentes Sicherheitsverhalten | %-Risiko, an COVID-19 zu erkranken | %-Risiko für schweren Verlauf | %-Risiko, zu sterben        |
|--------------------------------------|--------------------------------------|------------------------------|-----------------------------|-----------------------------|-----------------------------------|----------------------------------|---------------------------------|------------------------------------|-------------------------------|-----------------------------|
|                                      | Interzept                            | 5.69 ***<br>[5.40, 5.98]     | 1.34 ***<br>[1.25, 1.43]    | 4.20 ***<br>[4.08, 4.31]    | 4.67 ***<br>[4.58, 4.76]          | 5.81 ***<br>[5.74, 5.88]         | 5.04 ***<br>[4.95, 5.13]        | 48.85 ***<br>[47.18, 50.52]        | 15.98 ***<br>[14.53, 17.43]   | 4.08 ***<br>[2.88, 5.28]    |
| Zeit (ref: Phase 1)                  | Phase 2                              | 1.04 ***<br>[0.86, 1.22]     | 0.52 ***<br>[0.46, 0.57]    | -0.77 ***<br>[-0.84, -0.69] | 0.37 ***<br>[0.31, 0.42]          | -0.27 ***<br>[-0.31, -0.23]      | -0.12 ***<br>[-0.17, -0.06]     | -11.95 ***<br>[-12.97, -10.92]     | -1.33 **<br>[-2.22, -0.44]    | 1.14 **<br>[0.40, 1.87]     |
|                                      | Phase 3                              | -1.03 ***<br>[-1.20, -0.85]  | -0.20 ***<br>[-0.25, -0.14] | -0.62 ***<br>[-0.68, -0.55] | -0.33 ***<br>[-0.38, -0.27]       | -0.27 ***<br>[-0.32, -0.23]      | -1.23 ***<br>[-1.29, -1.18]     | -10.38 ***<br>[-11.37, -9.40]      | -2.43 ***<br>[-3.29, -1.57]   | -1.32 ***<br>[-2.03, -0.61] |
|                                      | Phase 4                              | 0.23 *<br>[0.05, 0.41]       | -0.07 *<br>[-0.13, -0.02]   | 0.44 ***<br>[0.37, 0.51]    | -0.03<br>[-0.09, 0.02]            | 0.24 ***<br>[0.20, 0.28]         | 0.54 ***<br>[0.49, 0.60]        | 3.19 ***<br>[2.16, 4.21]           | 1.30 **<br>[0.41, 2.19]       | 1.23 **<br>[0.49, 1.96]     |
|                                      | Phase 5                              | -0.21 *<br>[-0.38, -0.04]    | 0.00<br>[-0.05, 0.06]       | -0.04<br>[-0.11, 0.02]      | 0.04<br>[-0.01, 0.10]             | -0.02<br>[-0.06, 0.03]           | -0.07 *<br>[-0.12, -0.01]       | -0.17<br>[-1.15, 0.81]             | 0.58<br>[-0.27, 1.43]         | 0.62<br>[-0.09, 1.32]       |
|                                      | Geschlecht (ref: Weiblich)           | Männlich                     | -1.14 ***<br>[-1.29, -0.99] | -0.07 **<br>[-0.12, -0.02]  | -0.64 ***<br>[-0.70, -0.58]       | -0.14 ***<br>[-0.18, -0.09]      | -0.15 ***<br>[-0.19, -0.12]     | -0.46 ***<br>[-0.51, -0.41]        | -2.11 ***<br>[-2.98, -1.25]   | -5.12 ***<br>[-5.88, -4.37] |
|                                      | Divers                               | -0.23<br>[-1.39, 0.94]       | 0.45 *<br>[0.09, 0.82]      | -0.59 *<br>[-1.05, -0.13]   | -0.59 **<br>[-0.96, -0.23]        | -0.38 **<br>[-0.65, -0.10]       | -0.79 ***<br>[-1.15, -0.42]     | -5.42<br>[-12.05, 1.21]            | -6.05 *<br>[-11.81, -0.28]    | -4.13<br>[-8.89, 0.63]      |
| Alter (ref: 18-24 Jahre)             | 25-34 Jahre                          | -0.33 *<br>[-0.59, -0.06]    | -0.25 ***<br>[-0.34, -0.17] | 0.08<br>[-0.02, 0.19]       | -0.08<br>[-0.16, 0.00]            | -0.00<br>[-0.07, 0.06]           | 0.07<br>[-0.02, 0.15]           | 0.21<br>[-1.30, 1.73]              | 1.81 **<br>[0.50, 3.13]       | 1.99 ***<br>[0.90, 3.08]    |
|                                      | 35-44 Jahre                          | -0.28<br>[-0.57, 0.01]       | -0.29 ***<br>[-0.38, -0.20] | 0.39 ***<br>[0.28, 0.50]    | -0.01<br>[-0.10, 0.08]            | 0.03<br>[-0.04, 0.09]            | 0.36 ***<br>[0.27, 0.45]        | 0.46<br>[-1.18, 2.09]              | 4.76 ***<br>[3.33, 6.18]      | 3.50 ***<br>[2.33, 4.68]    |
|                                      | 45-54 Jahre                          | -0.74 ***<br>[-1.03, -0.44]  | -0.38 ***<br>[-0.47, -0.29] | 0.39 ***<br>[0.27, 0.51]    | 0.15 **<br>[0.05, 0.24]           | 0.12 ***<br>[0.05, 0.19]         | 0.41 ***<br>[0.32, 0.51]        | -1.57<br>[-3.26, 0.12]             | 6.34 ***<br>[4.87, 7.80]      | 5.15 ***<br>[3.94, 6.36]    |
|                                      | 55-64 Jahre                          | -1.39 ***<br>[-1.71, -1.08]  | -0.46 ***<br>[-0.56, -0.36] | 0.48 ***<br>[0.35, 0.60]    | 0.35 ***<br>[0.25, 0.45]          | 0.18 ***<br>[0.11, 0.26]         | 0.53 ***<br>[0.43, 0.63]        | -6.20 ***<br>[-7.99, -4.41]        | 10.00 ***<br>[8.44, 11.55]    | 7.29 ***<br>[6.00, 8.57]    |
|                                      | 65-74 Jahre                          | -2.28 ***<br>[-2.72, -1.85]  | -0.70 ***<br>[-0.84, -0.57] | 0.50 ***<br>[0.33, 0.67]    | 0.69 ***<br>[0.56, 0.83]          | 0.31 ***<br>[0.21, 0.41]         | 0.58 ***<br>[0.45, 0.72]        | -10.91 ***<br>[-13.38, -8.43]      | 12.79 ***<br>[10.64, 14.94]   | 9.95 ***<br>[8.18, 11.73]   |
|                                      | Alter 75+                            | -2.23 ***<br>[-3.03, -1.43]  | -0.76 ***<br>[-1.01, -0.51] | 0.78 ***<br>[0.47, 1.09]    | 0.99 ***<br>[0.74, 1.24]          | 0.25 *<br>[0.06, 0.44]           | 0.80 ***<br>[0.55, 1.05]        | -13.53 ***<br>[-18.08, -8.99]      | 25.38 ***<br>[21.43, 29.33]   | 24.19 ***<br>[20.93, 27.46] |
| Bildung (ref: Universitätsabschluss) | Abitur                               | 0.13<br>[-0.04, 0.31]        | 0.09 **<br>[0.04, 0.14]     | -0.15 ***<br>[-0.22, -0.08] | -0.24 ***<br>[-0.30, -0.19]       | -0.13 ***<br>[-0.17, -0.09]      | -0.13 ***<br>[-0.18, -0.08]     | -1.71 ***<br>[-2.69, -0.73]        | 1.42 **<br>[0.56, 2.27]       | 1.71 ***<br>[1.00, 2.41]    |
|                                      | Realschule                           | 0.32 **<br>[0.12, 0.51]      | 0.14 ***<br>[0.08, 0.21]    | -0.19 ***<br>[-0.27, -0.11] | -0.46 ***<br>[-0.52, -0.40]       | -0.29 ***<br>[-0.34, -0.25]      | -0.21 ***<br>[-0.27, -0.15]     | -3.34 ***<br>[-4.47, -2.21]        | 5.16 ***<br>[4.18, 6.15]      | 4.80 ***<br>[3.99, 5.61]    |
|                                      | Hauptschule                          | 0.39 *<br>[0.04, 0.73]       | 0.19 ***<br>[0.08, 0.30]    | -0.04<br>[-0.17, 0.10]      | -0.46 ***<br>[-0.56, -0.35]       | -0.45 ***<br>[-0.53, -0.37]      | -0.16 **<br>[-0.26, -0.05]      | -5.62 ***<br>[-7.58, -3.66]        | 8.35 ***<br>[6.64, 10.05]     | 9.81 ***<br>[8.41, 11.22]   |
|                                      | Kein Abschluss                       | 0.47<br>[-0.72, 1.65]        | 0.43 *<br>[0.06, 0.80]      | -0.12<br>[-0.58, 0.35]      | -0.33<br>[-0.70, 0.04]            | -0.84 ***<br>[-1.12, -0.56]      | -0.36<br>[-0.73, 0.01]          | -8.06 *<br>[-14.79, -1.33]         | 12.59 ***<br>[6.74, 18.44]    | 20.06 ***<br>[15.23, 24.89] |
|                                      | Sonstige                             | 0.52<br>[-0.01, 1.06]        | 0.11<br>[-0.06, 0.27]       | -0.03<br>[-0.24, 0.18]      | -0.29 ***<br>[-0.46, -0.12]       | -0.10<br>[-0.23, 0.03]           | -0.08<br>[-0.24, 0.09]          | -3.29 *<br>[-6.34, -0.25]          | 3.85 **<br>[1.20, 6.49]       | 3.68 ***<br>[1.50, 5.87]    |
| Beruf (ref: Andere)                  | Arbeitslos                           | 0.43 ***<br>[0.18, 0.68]     | 0.21 ***<br>[0.13, 0.29]    | 0.06<br>[-0.04, 0.16]       | -0.07<br>[-0.14, 0.01]            | 0.03<br>[-0.03, 0.09]            | 0.12 **<br>[0.04, 0.19]         | -1.98 **<br>[-3.39, -0.57]         | 4.02 ***<br>[2.79, 5.25]      | 3.71 ***<br>[2.69, 4.72]    |
|                                      | Arzt                                 | -0.52 **<br>[-0.90, -0.14]   | -0.17 **<br>[-0.29, -0.05]  | -0.30 ***<br>[-0.45, -0.15] | -0.16 **<br>[-0.28, -0.05]        | -0.03<br>[-0.12, 0.06]           | -0.17 **<br>[-0.29, -0.05]      | 6.26 ***<br>[4.11, 8.42]           | -7.72 ***<br>[-9.59, -5.84]   | -2.49 **<br>[-4.04, -0.95]  |
|                                      | Pflege                               | -0.51 ***<br>[-0.75, -0.28]  | -0.18 ***<br>[-0.25, -0.10] | -0.27 ***<br>[-0.36, -0.17] | -0.28 ***<br>[-0.35, -0.20]       | -0.01<br>[-0.06, 0.05]           | -0.16 ***<br>[-0.23, -0.08]     | 3.71 ***<br>[2.38, 5.03]           | -2.80 ***<br>[-3.95, -1.64]   | -1.30 **<br>[-2.25, -0.35]  |
|                                      | Rettungsdienst / Feuerwehr / Polizei | -1.01 ***<br>[-1.48, -0.54]  | -0.25 **<br>[-0.39, -0.10]  | -0.23 *<br>[-0.41, -0.04]   | -0.39 ***<br>[-0.54, -0.24]       | 0.04<br>[-0.07, 0.15]            | -0.25 ***<br>[-0.40, -0.11]     | 4.87 ***<br>[2.18, 7.56]           | -1.94<br>[-4.28, 0.40]        | -0.77<br>[-2.70, 1.16]      |
|                                      | Schüler / Student                    | 0.28 *<br>[0.01, 0.55]       | 0.09 *<br>[0.01, 0.18]      | 0.09<br>[-0.02, 0.20]       | 0.20 ***<br>[0.12, 0.28]          | 0.10 **<br>[0.04, 0.16]          | 0.07<br>[-0.01, 0.16]           | -1.64 *<br>[-3.17, -0.10]          | -1.07<br>[-2.40, 0.27]        | -0.00<br>[-1.10, 1.10]      |
| Psychische Erkrankung (ref: nein)    | Ja                                   | 4.48 ***<br>[4.27, 4.69]     | 1.53 ***<br>[1.46, 1.60]    | 0.36 ***<br>[0.28, 0.44]    | -0.21 ***<br>[-0.28, -0.15]       | 0.01<br>[-0.04, 0.06]            | 0.14 ***<br>[0.07, 0.20]        | 2.22 ***<br>[1.01, 3.43]           | 3.39 ***<br>[2.34, 4.44]      | 3.03 ***<br>[2.17, 3.90]    |
|                                      | Gemeindegröße (ref: Großstadt)       | Mittelgroße Stadt            | 0.11<br>[-0.06, 0.28]       | 0.03<br>[-0.02, 0.09]       | -0.06<br>[-0.13, 0.00]            | -0.13 ***<br>[-0.19, -0.08]      | -0.12 ***<br>[-0.16, -0.08]     | 0.02<br>[-0.03, 0.07]              | -0.27<br>[-1.24, 0.69]        | 0.63<br>[-0.22, 1.47]       |
|                                      | Kleinstadt                           | 0.16<br>[-0.06, 0.38]        | 0.04<br>[-0.03, 0.11]       | -0.07<br>[-0.16, 0.02]      | -0.09 **<br>[-0.16, -0.02]        | -0.09 ***<br>[-0.14, -0.04]      | 0.11 **<br>[0.04, 0.18]         | -0.11<br>[-1.37, 1.16]             | 0.08<br>[-1.02, 1.18]         | 0.12<br>[-0.79, 1.03]       |
|                                      | Landkreis                            | 0.20<br>[-0.03, 0.42]        | -0.01<br>[-0.08, 0.06]      | -0.14 **<br>[-0.23, -0.06]  | -0.24 ***<br>[-0.31, -0.17]       | -0.12 ***<br>[-0.17, -0.06]      | 0.06<br>[-0.01, 0.13]           | -0.38<br>[-1.65, 0.90]             | 0.35<br>[-0.76, 1.45]         | 0.29<br>[-0.62, 1.20]       |
| Körperliche Erkrankung (ref: nein)   | Ja                                   | 0.49 ***<br>[0.31, 0.66]     | 0.10 ***<br>[0.05, 0.16]    | 0.30 ***<br>[0.23, 0.37]    | -0.12 ***<br>[-0.18, -0.07]       | 0.03<br>[-0.01, 0.07]            | 0.16 ***<br>[0.11, 0.22]        | 2.73 ***<br>[1.74, 3.72]           | 14.03 ***<br>[13.17, 14.89]   | 8.67 ***<br>[7.96, 9.38]    |
|                                      | N                                    | 16916                        | 16916                       | 16916                       | 16916                             | 16916                            | 16916                           | 16916                              | 16916                         | 16916                       |
|                                      | R2                                   | 0.18                         | 0.18                        | 0.11                        | 0.08                              | 0.06                             | 0.23                            | 0.08                               | 0.17                          | 0.14                        |

\*\*\* p < 0.001; \*\* p < 0.01; \* p < 0.05.

**Tab. Z4: Robuste Regressionen**

Tabelle Z4a: Regressionstabelle / Robuste Regression

| Variable                       | Regressionsterm                         | Generalisierte Angst (GAD-7) | Depressive Symptome (PHQ-2) |                             |
|--------------------------------|-----------------------------------------|------------------------------|-----------------------------|-----------------------------|
|                                | Interzept                               | 5.69 ***<br>[5.38. 6.00]     | 1.34 ***<br>[1.24. 1.44]    |                             |
| Zeit (ref: Phase 1)            | Phase 2                                 | 1.04 ***<br>[0.85. 1.22]     | 0.52 ***<br>[0.45. 0.58]    |                             |
|                                | Phase 3                                 | -1.03 ***<br>[-1.21. -0.84]  | -0.20 ***<br>[-0.26. -0.14] |                             |
|                                | Phase 4                                 | 0.23 *<br>[0.03. 0.42]       | -0.07 *<br>[-0.14. -0.01]   |                             |
|                                | Phase 5                                 | -0.21 *<br>[-0.40. -0.02]    | 0.00<br>[-0.06. 0.06]       |                             |
|                                | Männlich                                | -1.14 ***<br>[-1.29. -0.99]  | -0.07 **<br>[-0.12. -0.03]  |                             |
| Geschlecht (ref: Weiblich)     | Divers                                  | -0.23<br>[-1.55. 1.10]       | 0.45 *<br>[0.00. 0.91]      |                             |
|                                | Alter (ref: 18-24 Jahre)                | 25-34 Jahre                  | -0.33 *<br>[-0.61. -0.05]   | -0.25 ***<br>[-0.35. -0.16] |
|                                | 35-44 Jahre                             | -0.28<br>[-0.58. 0.02]       | -0.29 ***<br>[-0.39. -0.19] |                             |
|                                | 45-54 Jahre                             | -0.74 ***<br>[-1.05. -0.43]  | -0.38 ***<br>[-0.48. -0.28] |                             |
|                                | 55-64 Jahre                             | -1.39 ***<br>[-1.72. -1.07]  | -0.46 ***<br>[-0.57. -0.36] |                             |
|                                | 65-74 Jahre                             | -2.28 ***<br>[-2.70. -1.86]  | -0.70 ***<br>[-0.84. -0.57] |                             |
|                                | Alter 75+                               | -2.23 ***<br>[-2.91. -1.54]  | -0.76 ***<br>[-0.99. -0.52] |                             |
|                                | Bildung (ref: Universitätsabschluss)    | Abitur                       | 0.13<br>[-0.04. 0.31]       | 0.09 **<br>[0.04. 0.14]     |
|                                |                                         | Realschule                   | 0.32 **<br>[0.11. 0.52]     | 0.14 ***<br>[0.08. 0.21]    |
| Hauptschule                    |                                         | 0.39 *<br>[0.04. 0.74]       | 0.19 **<br>[0.07. 0.30]     |                             |
| Kein Abschluss                 |                                         | 0.47<br>[-0.94. 1.88]        | 0.43<br>[-0.07. 0.92]       |                             |
| Sonstige                       |                                         | 0.52<br>[-0.09. 1.14]        | 0.11<br>[-0.08. 0.29]       |                             |
| Beruf (ref: Andere)            |                                         | Arbeitslos                   | 0.43 **<br>[0.16. 0.70]     | 0.21 ***<br>[0.12. 0.30]    |
|                                | Arzt                                    | -0.52 **<br>[-0.84. -0.20]   | -0.17 ***<br>[-0.26. -0.07] |                             |
|                                | Pflege                                  | -0.51 ***<br>[-0.74. -0.29]  | -0.18 ***<br>[-0.24. -0.11] |                             |
|                                | Rettungsdienst /<br>Feuerwehr / Polizei | -1.01 ***<br>[-1.44. -0.58]  | -0.25 ***<br>[-0.37. -0.12] |                             |
|                                | Schüler / Student                       | 0.28<br>[-0.00. 0.56]        | 0.09 *<br>[0.00. 0.18]      |                             |
|                                | Psychischer Erkrankung (ref: nein)      | Ja                           | 4.48 ***<br>[4.22. 4.73]    | 1.53 ***<br>[1.44. 1.62]    |
| Gemeindegröße (ref: Großstadt) | Mittelgroße Stadt                       | 0.11<br>[-0.06. 0.28]        | 0.03<br>[-0.02. 0.09]       |                             |
|                                | Kleinstadt                              | 0.16<br>[-0.06. 0.39]        | 0.04<br>[-0.03. 0.11]       |                             |
|                                | Landkreis                               | 0.20<br>[-0.03. 0.43]        | -0.01<br>[-0.09. 0.06]      |                             |
|                                | Körperliche Erkrankung (ref: nein):     | Ja                           | 0.49 ***<br>[0.31. 0.67]    | 0.10 ***<br>[0.05. 0.16]    |
|                                | N                                       | 16916                        | 16916                       |                             |
|                                | R2                                      | 0.18                         | 0.18                        |                             |

Die Standardfehler sind robust gegen Heteroskedastizität. \*\*\* p < 0.001; \*\* p < 0.01; \* p < 0.05.

4b: Regressionstabelle / Robuste Regression

| Variable                             | Regressionsterm                | COVID-19-bezogene Angst     | Vertrauen in politische Maßnahmen | Subjektives Informiertheitslevel | Adhärentes Sicherheitsverhalten |                         |
|--------------------------------------|--------------------------------|-----------------------------|-----------------------------------|----------------------------------|---------------------------------|-------------------------|
|                                      | Interzept                      | 4.20 ***<br>[4.08, 4.31]    | 4.67 ***<br>[4.58, 4.76]          | 5.81 ***<br>[5.74, 5.88]         | 5.04 ***<br>[4.95, 5.13]        |                         |
| Zeit (ref: Phase 1)                  | Phase 2                        | -0.77 ***<br>[-0.84, -0.69] | 0.37 ***<br>[0.31, 0.43]          | -0.27 ***<br>[-0.32, -0.22]      | -0.12 ***<br>[-0.18, -0.05]     |                         |
|                                      | Phase 3                        | -0.62 ***<br>[-0.69, -0.54] | -0.33 ***<br>[-0.38, -0.27]       | -0.27 ***<br>[-0.32, -0.23]      | -1.23 ***<br>[-1.29, -1.17]     |                         |
|                                      | Phase 4                        | 0.44 ***<br>[0.36, 0.51]    | -0.03<br>[-0.09, 0.02]            | 0.24 ***<br>[0.19, 0.29]         | 0.54 ***<br>[0.48, 0.61]        |                         |
|                                      | Phase 5                        | -0.04<br>[-0.12, 0.03]      | 0.04<br>[-0.01, 0.10]             | -0.02<br>[-0.06, 0.03]           | -0.07 *<br>[-0.12, -0.01]       |                         |
|                                      | Divers                         | -0.64 ***<br>[-0.70, -0.58] | -0.14 ***<br>[-0.18, -0.09]       | -0.15 ***<br>[-0.19, -0.12]      | -0.46 ***<br>[-0.51, -0.41]     |                         |
| Geschlecht (ref: Weiblich)           | Männlich                       | -0.59 *<br>[-1.04, -0.13]   | -0.59 **<br>[-1.03, -0.16]        | -0.38 *<br>[-0.70, -0.05]        | -0.79 ***<br>[-1.18, -0.39]     |                         |
|                                      | 25-34 Jahre                    | 0.08<br>[-0.02, 0.19]       | -0.08 *<br>[-0.16, -0.00]         | -0.00<br>[-0.06, 0.06]           | 0.07<br>[-0.02, 0.15]           |                         |
|                                      | 35-44 Jahre                    | 0.39 ***<br>[0.28, 0.50]    | -0.01<br>[-0.10, 0.08]            | 0.03<br>[-0.04, 0.09]            | 0.36 ***<br>[0.27, 0.45]        |                         |
|                                      | 45-54 Jahre                    | 0.39 ***<br>[0.27, 0.51]    | 0.15 **<br>[0.06, 0.24]           | 0.12 ***<br>[0.05, 0.19]         | 0.41 ***<br>[0.32, 0.51]        |                         |
|                                      | 55-64 Jahre                    | 0.48 ***<br>[0.35, 0.60]    | 0.35 ***<br>[0.25, 0.45]          | 0.18 ***<br>[0.11, 0.26]         | 0.53 ***<br>[0.43, 0.63]        |                         |
|                                      | 65-74 Jahre                    | 0.50 ***<br>[0.33, 0.67]    | 0.69 ***<br>[0.56, 0.82]          | 0.31 ***<br>[0.21, 0.41]         | 0.58 ***<br>[0.45, 0.72]        |                         |
|                                      | Alter 75+                      | 0.78 ***<br>[0.45, 1.10]    | 0.99 ***<br>[0.74, 1.25]          | 0.25 *<br>[0.05, 0.45]           | 0.80 ***<br>[0.54, 1.06]        |                         |
| Bildung (ref: Universitätsabschluss) | Abitur                         | -0.15 ***<br>[-0.22, -0.08] | -0.24 ***<br>[-0.30, -0.19]       | -0.13 ***<br>[-0.17, -0.09]      | -0.13 ***<br>[-0.18, -0.08]     |                         |
|                                      | Realschule                     | -0.19 ***<br>[-0.27, -0.11] | -0.46 ***<br>[-0.52, -0.39]       | -0.29 ***<br>[-0.34, -0.24]      | -0.21 ***<br>[-0.27, -0.14]     |                         |
|                                      | Hauptschule                    | -0.04<br>[-0.18, 0.11]      | -0.46 ***<br>[-0.57, -0.34]       | -0.45 ***<br>[-0.54, -0.35]      | -0.16 **<br>[-0.27, -0.04]      |                         |
|                                      | Kein Abschluss                 | -0.12<br>[-0.65, 0.42]      | -0.33<br>[-0.81, 0.15]            | -0.84 ***<br>[-1.30, -0.38]      | -0.36<br>[-0.81, 0.09]          |                         |
|                                      | Sonstige                       | -0.03<br>[-0.24, 0.19]      | -0.29 ***<br>[-0.46, -0.12]       | -0.10<br>[-0.23, 0.03]           | -0.08<br>[-0.24, 0.08]          |                         |
|                                      | Beruf (ref: Andere)            | Arbeitslos                  | 0.06<br>[-0.04, 0.16]             | -0.07<br>[-0.15, 0.01]           | 0.03<br>[-0.03, 0.09]           | 0.12 **<br>[0.04, 0.19] |
| Arzt                                 |                                | -0.30 ***<br>[-0.45, -0.15] | -0.16 **<br>[-0.28, -0.04]        | -0.03<br>[-0.12, 0.07]           | -0.17 **<br>[-0.29, -0.05]      |                         |
| Pflege                               |                                | -0.27 ***<br>[-0.36, -0.17] | -0.28 ***<br>[-0.35, -0.20]       | -0.01<br>[-0.07, 0.05]           | -0.16 ***<br>[-0.23, -0.08]     |                         |
| Rettungsdienst / Feuerwehr / Polizei |                                | -0.23 *<br>[-0.42, -0.03]   | -0.39 ***<br>[-0.55, -0.23]       | 0.04<br>[-0.08, 0.17]            | -0.25 **<br>[-0.42, -0.09]      |                         |
| Schüler / Student                    |                                | 0.09<br>[-0.01, 0.20]       | 0.20 ***<br>[0.12, 0.28]          | 0.10 **<br>[0.04, 0.16]          | 0.07<br>[-0.01, 0.16]           |                         |
| Psychischer Erkrankung (ref: nein)   | Ja                             | 0.36 ***<br>[0.28, 0.44]    | -0.21 ***<br>[-0.28, -0.15]       | 0.01<br>[-0.04, 0.06]            | 0.14 ***<br>[0.07, 0.20]        |                         |
|                                      | Gemeindegröße (ref: Großstadt) | Mittelgroße Stadt           | -0.06<br>[-0.13, 0.00]            | -0.13 ***<br>[-0.19, -0.08]      | -0.12 ***<br>[-0.16, -0.08]     | 0.02<br>[-0.03, 0.08]   |
|                                      |                                | Kleinstadt                  | -0.07<br>[-0.16, 0.02]            | -0.09 **<br>[-0.16, -0.02]       | -0.09 **<br>[-0.14, -0.03]      | 0.11 **<br>[0.04, 0.18] |
| Körperliche Erkrankung (ref: nein)   | Landkreis                      | -0.14 **<br>[-0.24, -0.05]  | -0.24 ***<br>[-0.31, -0.17]       | -0.12 ***<br>[-0.17, -0.06]      | 0.06<br>[-0.02, 0.13]           |                         |
|                                      | Ja                             | 0.30 ***<br>[0.23, 0.37]    | -0.12 ***<br>[-0.18, -0.07]       | 0.03<br>[-0.02, 0.07]            | 0.16 ***<br>[0.11, 0.22]        |                         |
|                                      | N                              | 16916                       | 16916                             | 16916                            | 16916                           |                         |
| R2                                   | 0.11                           | 0.08                        | 0.06                              | 0.23                             |                                 |                         |

Die Standardfehler sind robust gegen Heteroskedastizität. \*\*\* p &lt; 0.001; \*\* p &lt; 0.01; \* p &lt; 0.05.



## 4c: Regressionstabelle / Robuste Regression

| Variable                                 | Regressionsterm                         | %-Risiko, an COVID-19 zu erkranken | %-Risiko für schweren Verlauf | %-Risiko, zu sterben        |
|------------------------------------------|-----------------------------------------|------------------------------------|-------------------------------|-----------------------------|
|                                          | Interzept                               | 48.85 ***<br>[47.16, 50.53]        | 15.98 ***<br>[14.66, 17.30]   | 4.08 ***<br>[3.06, 5.10]    |
| Zeit (ref: Phase 1)                      | Phase 2                                 | -11.95 ***<br>[-13.04, -10.86]     | -1.33 **<br>[-2.28, -0.38]    | 1.14 **<br>[0.34, 1.93]     |
|                                          | Phase 3                                 | -10.38 ***<br>[-11.44, -9.33]      | -2.43 ***<br>[-3.34, -1.52]   | -1.32 ***<br>[-2.08, -0.56] |
|                                          | Phase 4                                 | 3.19 ***<br>[2.10, 4.27]           | 1.30 **<br>[0.39, 2.21]       | 1.23 **<br>[0.47, 1.99]     |
|                                          | Phase 5                                 | -0.17<br>[-1.20, 0.86]             | 0.58<br>[-0.30, 1.45]         | 0.62<br>[-0.11, 1.35]       |
|                                          |                                         |                                    |                               |                             |
| Geschlecht (ref: Weiblich)               | Männlich                                | -2.11 ***<br>[-3.01, -1.22]        | -5.12 ***<br>[-5.87, -4.38]   | -3.16 ***<br>[-3.77, -2.55] |
|                                          | Divers                                  | -5.42<br>[-13.40, 2.57]            | -6.05 *<br>[-11.90, -0.20]    | -4.13<br>[-9.21, 0.94]      |
|                                          |                                         |                                    |                               |                             |
| Alter (ref: 18-24 Jahre)                 | 25-34 Jahre                             | 0.21<br>[-1.32, 1.75]              | 1.81 **<br>[0.64, 2.99]       | 1.99 ***<br>[1.10, 2.88]    |
|                                          | 35-44 Jahre                             | 0.46<br>[-1.21, 2.12]              | 4.76 ***<br>[3.45, 6.06]      | 3.50 ***<br>[2.49, 4.52]    |
|                                          | 45-54 Jahre                             | -1.57<br>[-3.29, 0.15]             | 6.34 ***<br>[4.96, 7.71]      | 5.15 ***<br>[4.05, 6.25]    |
|                                          | 55-64 Jahre                             | -6.20 ***<br>[-8.00, -4.40]        | 10.00 ***<br>[8.47, 11.53]    | 7.29 ***<br>[6.03, 8.54]    |
|                                          | 65-74 Jahre                             | -10.91 ***<br>[-13.30, -8.51]      | 12.79 ***<br>[10.43, 15.14]   | 9.95 ***<br>[7.86, 12.04]   |
|                                          | Alter 75+                               | -13.53 ***<br>[-17.98, -9.09]      | 25.38 ***<br>[20.31, 30.46]   | 24.19 ***<br>[18.63, 29.75] |
|                                          |                                         |                                    |                               |                             |
| Bildung-<br>(ref: Universitätsabschluss) | Abitur                                  | -1.71 ***<br>[-2.69, -0.74]        | 1.42 ***<br>[0.59, 2.24]      | 1.71 ***<br>[1.05, 2.37]    |
|                                          | Realschule                              | -3.34 ***<br>[-4.49, -2.20]        | 5.16 ***<br>[4.10, 6.22]      | 4.80 ***<br>[3.90, 5.69]    |
|                                          | Hauptschule                             | -5.62 ***<br>[-7.61, -3.62]        | 8.35 ***<br>[6.25, 10.44]     | 9.81 ***<br>[7.82, 11.81]   |
|                                          | Kein Abschluss                          | -8.06<br>[-16.49, 0.38]            | 12.59 **<br>[4.77, 20.41]     | 20.06 ***<br>[11.52, 28.60] |
|                                          | Sonstige                                | -3.29 *<br>[-6.50, -0.08]          | 3.85 **<br>[0.92, 6.77]       | 3.68 **<br>[1.10, 6.27]     |
|                                          |                                         |                                    |                               |                             |
| Beruf (ref: Andere)                      | Arbeitslos                              | -1.98 **<br>[-3.38, -0.58]         | 4.02 ***<br>[2.55, 5.49]      | 3.71 ***<br>[2.37, 5.05]    |
|                                          | Arzt                                    | 6.26 ***<br>[3.97, 8.55]           | -7.72 ***<br>[-9.24, -6.20]   | -2.49 ***<br>[-3.78, -1.21] |
|                                          | Pflege                                  | 3.71 ***<br>[2.35, 5.06]           | -2.80 ***<br>[-3.95, -1.64]   | -1.30 **<br>[-2.28, -0.33]  |
|                                          | Rettungsdienst / Feuerwehr /<br>Polizei | 4.87 ***<br>[2.11, 7.63]           | -1.94<br>[-4.00, 0.11]        | -0.77<br>[-2.48, 0.95]      |
|                                          | Schüler / Student                       | -1.64 *<br>[-3.17, -0.10]          | -1.07<br>[-2.26, 0.13]        | -0.00<br>[-0.93, 0.92]      |
| Psychischer Erkrankung<br>(ref: nein)    | 2.22 ***<br>[1.05, 3.39]                | 3.39 ***<br>[2.26, 4.52]           | 3.03 ***<br>[2.03, 4.03]      |                             |
| Gemeindegröße<br>(ref: Großstadt)        | Mittelgroße Stadt                       | -0.27<br>[-1.24, 0.69]             | 0.63<br>[-0.22, 1.47]         | 0.40<br>[-0.30, 1.10]       |
|                                          | Kleinstadt                              | -0.11<br>[-1.38, 1.16]             | 0.08<br>[-1.05, 1.21]         | 0.12<br>[-0.83, 1.07]       |
|                                          | Landkreis                               | -0.38<br>[-1.70, 0.95]             | 0.35<br>[-0.82, 1.52]         | 0.29<br>[-0.69, 1.27]       |
| Körperliche Erkrankung<br>(ref: nein)    | Ja                                      | 2.73 ***<br>[1.75, 3.70]           | 14.03 ***<br>[13.00, 15.06]   | 8.67 ***<br>[7.77, 9.57]    |
|                                          |                                         |                                    |                               |                             |
|                                          | N                                       | 16916                              | 16916                         | 16916                       |
|                                          | R2                                      | 0.08                               | 0.17                          | 0.14                        |

Die Standardfehler sind robust gegen Heteroskedastizität. \*\*\* p &lt; 0.001; \*\* p &lt; 0.01; \* p &lt; 0.05.
